# Supplementary material for: Genes Contributing to Staphylococcus aureus Fitness in Abscess- and Infection-Related Ecologies
Source: PubMed Central journal article supplement — mBio. 2014 Sep 2;5(5):e01729-14. doi: 10.1128/mBio.01729-14 (PMC4173792; doi:10.1128/mbio.01729-14), 2014-09-02
Supplement: mbo999101979s1.pdf [file mbo999101979s1.pdf]

## 1 **Supplementary Materials**

2 **Bacterial strains.** *Staphylococcus aureus* strain HG003 was chosen as the  
3 background strain for this study because: a) it was originally isolated as an  
4 infection-derived ST8 strain, the most common sequence type associated with  
5 methicillin resistant infection in the community (1), but is not itself methicillin-  
6 resistant (2), adding an additional level of safety to animal experimentation; b)  
7 related strains have served as the basis for many studies, including a complete  
8 genome sequence determination (GenBank accession no. CP000253) (Gillaspy  
9 A.F., *et al*; "The *Staphylococcus aureus* NCTC8325 genome"; Direct Submission  
10 (JAN-2006) to the EMBL/GenBank/DDBJ databases.); and c) it has been verified  
11 as a fully virulent and representative of ST8 (2). Inducible antisense constructs  
12 were initially generated in *E. coli* DH5a, and subsequently tested in *S. aureus*  
13 strain RN4220.

14

15 **Construction and validation of the transposon library.** The mariner-based  
16 *bursa aurealis* transposon insertion system (60) was used to construct a  
17 mutagenized library in HG003 essentially as described by Bae *et al.* (57).  
18 Confirmation of independent, unique transposon insertion was achieved by  
19 screening 20 randomly selected colonies by inverse PCR, as previously  
20 described (57). Approximately 5,000 colonies from 20 plates were harvested  
21 directly using 5 mL BHI with erythromycin to wash each plate, which was mixed  
22 with 5 mL 50% glycerol to generate 20 separate 10 mL aliquots each  
23 representing a subset of the library. Before freezing at -80°C, each tube was

24 thoroughly homogenized by vortexing and 1 mL was pooled into a single aliquot  
25 representing the entire library encompassing approximately 100,000 individual  
26 transposon insertions. Total DNA was extracted from 1 mL of the library freezer  
27 stock using the DNeasy blood and tissue kit (Qiagen, Valencia, CA), following  
28 manufacturer's specifications, and subjected to Tn-Seq analysis.

29

30 **Competitive fitness in laboratory medium versus physiological fluids.** To  
31 generate a common inoculum for determining which genes encode products that  
32 are critical for competitive growth of *S. aureus* in different environments, 100  $\mu$ L  
33 representing  $10^8$  colony forming units (CFU) of the *S. aureus* transposon library  
34 stock was inoculated into 100 mL BHI without antibiotic, and incubated overnight  
35 at 37°C. An overview of the experimental strategy to determine genes essential  
36 for fitness in competitive, infection-relevant contexts is illustrated in Figure S1. A  
37 10  $\mu$ L aliquot of this culture, containing  $10^7$  CFU was then used to inoculate 10  
38 mL of fresh BHI (control), 10 mL of bovine aqueous or vitreous fluids buffered  
39 with 25 mM MOPS. Aqueous and vitreous fluid were aspirated from freshly  
40 enucleated bovine eyes (Sierra Medical, Whittier, CA), and filtered through a 0.45  
41  $\mu$ m HT Tuffryn membrane sterile acrodisc syringe filter (Whatman, Clifton, NJ)  
42 before storage at -80°C. Peripheral blood was freshly isolated from healthy  
43 volunteers into heparinized Vacutainer collection tubes (BD, Franklin Lakes, NJ)  
44 following Institutional Review Board approved protocol #11-093H. Preliminary  
45 studies examining culture of these mutants in blood found a decrease in viable  
46 cells following inoculation, therefore a 100  $\mu$ l inoculum representing  $10^8$  CFU,

47 into 10 mL, was adopted to overcome potential population bottlenecks in the  
48 library pool. No such drop was observed in vitreous or aqueous cultures.  
49 Bacterial growth in physiological fluids occurred at 37°C with shaking at 225  
50 RPM. Biological replicates were conducted for each growth condition. Bacteria  
51 were grown for 24 hours, and 9-10 generations of outgrowth occurred in each  
52 growth condition. Cultures were harvested by centrifugation at 13,000 x g for 10  
53 min. To facilitate the lysis and removal of eukaryotic cells from the blood, cultures  
54 were washed three times by resuspending in an equal volume of deionized water  
55 and centrifugation. DNA was then isolated from the bacteria harvested from each  
56 growth condition, using the DNeasy blood and tissue kit (Qiagen, Valencia, CA)  
57 following manufacturer's specifications.

58

59 **Competitive fitness in a murine abscess.** The competitive ability of various  
60 *mariner* insertion mutants of *S. aureus* to proliferate at the site of infection was  
61 tested using a murine abscess model, essentially as described (38) (Figure S3A).  
62 In order to prepare the mutant library for injection, a 100 µL aliquot of the input  
63 library freezer stock, representing  $10^8$  CFU, was inoculated into 100 mL of BHI  
64 without antibiotic selection and was cultured overnight at 37°C. To isolate cells in  
65 exponential growth phase, a 1:1000 dilution from the overnight was made into  
66 fresh BHI without antibiotic and bacterial growth was monitored until an O.D.<sub>600</sub> of  
67 0.8 was reached. A 1 mL sample was harvested, centrifuged and resuspended in  
68 2 mL sterile phosphate-buffered saline (PBS), diluted 1:10 to achieve  $10^7$   
69 CFU/mL in 1 mL sterile PBS and mixed with an equal volume of autoclaved

70 Cytodex-1 beads (60 – 87  $\mu\text{m}$ ; Sigma, St, Louis, MO). A 200  $\mu\text{L}$  aliquot  
71 containing  $5 \times 10^6$  CFU was injected subcutaneously into each shaved hind flank  
72 of a 4-5 week old Swiss Webster male mouse, anesthetized with ketamine and  
73 xylazine, and allowed to form abscesses for 24 or 48 h before harvest. Groups of  
74 5 mice were used for either 24 h or 48 h abscess growth studies (Figure S3B).  
75 For each time point, four animals were used for Tn-Seq analysis and output CFU  
76 enumeration and one for histology (Figure S3C). Abscesses were excised from  
77 each animal with flank skin attached and immediately placed on ice. Extraneous  
78 skin and tissue were carefully removed before each abscess was pulverized in 1  
79 mL BHI in a 1.5 mL tube using a mortar, followed by a 1-3 second vortex.  
80 Bacterial load was quantified for each abscess by track dilution (3). The average  
81 bacterial load per abscess was found to be  $7.75 \times 10^6$  CFU. To enrich for bacterial  
82 cells available for Tn-seq analysis, a 0.5 mL aliquot from two suspended  
83 abscesses were pooled together, and used to inoculate 4 mL of BHI  
84 supplemented with 10  $\mu\text{g}/\text{mL}$  erythromycin ( $1.55 \times 10^6$  CFU/mL). Abscesses  
85 harvested from the contralateral flanks from two animals were pooled in efforts to  
86 equalize animal-to-animal variability that might have arisen due to technical  
87 reasons (e.g., variability in injection size, depth, inoculum). Pooled samples were  
88 cultured for 5 h at  $37^\circ\text{C}$ , allowing between 5 – 6 generations in order to enrich  
89 the bacterial profiles while minimizing potential biasing during this outgrowth  
90 phase, as well as aiding in the lysis and removal of any residual eukaryotic cells.  
91 Average bacterial outgrowth during the 5 h was found to be  $6.7 \times 10^7$  CFU/mL by  
92 track dilution plating. The top 4.5 mL from each tube enriched in bacterial cells

93 (remaining eukaryotic cells will sink to the bottom), representing  $3 \times 10^8$  CFU, was  
94 harvested for DNA isolation using the DNeasy blood and tissue kit following  
95 manufacturer's specifications (Qiagen, Valencia, CA), which was subsequently  
96 subjected to preparation for Tn-Seq analysis as described below.

97

98 **Sequencing of libraries.** Molecular methods used to construct the Illumina  
99 sequencing libraries was recently described (61). Briefly, genomic DNA (50-100  
100 L at 70 ng/L) was further purified using an Edge Biosystems spin column  
101 (Gaithersburg, MD), and 130  $\mu$ L was sheared in a Covaris sonicator (Woburn,  
102 MA) to generate products of average size of approximately 200-600 bp. PolyC  
103 tails were added to 1  $\mu$ g of the sheared DNA in a 20  $\mu$ L reaction containing 0.5  
104  $\mu$ L terminal deoxynucleotidyl transferase (TdT, Promega, Madison, WI), 4 L 5x  
105 TdT reaction buffer (Promega, Madison, WI), 9.5 mM dCTP / 0.5 mM ddCTP.  
106 Following a 1 h at 37°C, enzyme was inactivated by incubation at 75 °C for 20  
107 minutes and sheared products repurified using an Edge Biosystems spin column  
108 (Gaithersburg, MD). Transposon-genome fusion fragments were specifically  
109 amplified in an initial 50  $\mu$ L PCR reaction that contained 5  $\mu$ L C-tailed template,  
110 600 nM oligo dG primer (Table S10), 600 nM transposon-specific primer (Table  
111 S10), 400 M dNTPs, 5  $\mu$ L 10x Easy-A buffer (Stratagene-Agilent Technologies,  
112 Santa Clara, CA), and 1  $\mu$ L Easy-A high fidelity PCR cloning enzyme using the  
113 following thermocycler program: Initial denaturation 95 °C, 2 minutes; followed by  
114 25 cycles of 95 °C denaturation for 30 seconds; 60 °C annealing for 30 seconds;  
115 72 °C extension for 120 seconds; followed by a 4 °C hold. A second PCR

116 reaction using a nested pBursa primer was then used to provide added specificity  
117 and append the primer sequences needed for Illumina sequencing and indexing.  
118 This 50  $\mu$ L reaction contained 1  $\mu$ L of template from the previous PCR reaction,  
119 600 nM transposon end-specific primer (Table S4), 600 nM indexing primer (1 of  
120 15 available indices), 400 M dNTPs, 5  $\mu$ L 10x Easy-A buffer (Stratagene-Agilent  
121 Technologies, Santa Clara, CA), and 1  $\mu$ L Easy-A high fidelity PCR cloning  
122 enzyme using the same thermocycler program described above, but only for 10 –  
123 15 cycles. Up to 15 different resulting libraries were multiplexed and sequenced  
124 in parallel for 51 cycles in a single end sequencing reaction on a single lane of an  
125 Illumina HiSeq 2000 (Tufts University Genomic Core Facility) using a custom  
126 sequencing primer and a standard Illumina index sequencing primer (Table S4).

127

128 **Data analysis.** Mapping of transposon-genome junction sequence reads to the  
129 HG003 genome was carried out utilizing custom scripts and programs on the  
130 Tufts University Galaxy server. The computational methods used for analysis  
131 was recently published (61). Briefly, following removal of adapter and transposon  
132 sequence, genomic sequences with a minimum read length of 25 nucleotides  
133 were aligned to the *S. aureus* reference genome of the HG003 parent strain  
134 NCTC8325 (Genebank: CP000253.1), using bowtie with its default settings. The  
135 resulting bowtie output file was then used as input for a custom script,  
136 “hopcount”. Hopcount tabulates the number of times individual insertion  
137 amplicons were re-sequenced. An excel spreadsheet is generated that for each  
138 insertion site, indicates its position within the genome, gene locus to which that

139 position maps, the strand (positive vs. negative) associated with the site, as well  
140 as the number of each amplicon species read. Hopcount output was used to  
141 determine the complexity of transposon libraries, and to identify shifts in the  
142 representation of specific mariner insertion in input and output samples. It was  
143 also used as input for a second custom script, "Aggregate Hop Table". The  
144 output of this script is an excel file in which all individual transposon insertion  
145 amplicon reads are tabulated by their collective frequency in each annotated  
146 gene of the genome. For each gene, the number of unique insertions sites  
147 observed, absolute count of sites in the positive strand, in negative strand, and in  
148 both strands is tabulated. Also recorded is a value, dval, which normalizes the  
149 total number of insertion amplicon reads occurring in a specific gene to the  
150 number expected for that gene bases solely on its size and assuming complete  
151 randomness of insertion. That is, dval represents the observed number of  
152 mappable reads of insertions in a gene, divided by the number of mappable  
153 reads of insertions predicted for that gene based on its size relative to the  
154 genome and the total number of mappable reads obtained for that experiment.  
155 Typically, approximately 500 amplicons from each transposon insertion site are  
156 read in a sequencing reaction, resulting in about 10,000 total reads for all  
157 transposon insertions in a 1000 bp gene. To illustrate dval, in a typical  
158 experiment, a 1 kb gene for which 10,000 reads were obtained would have a dval  
159 ratio of 1.0 (10,000 reads obtained divided by 10,000 reads expected). Obtaining  
160 only 1,000 reads for this gene would result in a dval ratio of 0.1, indicating that  
161 fewer amplicons of *mariner* fusion insertions in that gene were read than would

162 be predicted; and 100 reads a dval of 0.01, indicating a high level of  
163 underrepresentation of insertions in that gene.

164

165 **Parameters for preliminary identification of genes encoding functions likely**  
166 **to be essential or making an important contribution to fitness in a**  
167 **particular environment.** Following transposon fusion fragment sequencing and  
168 bioinformatic analysis, all HG003 genes encoding open reading frames, or known  
169 structural RNAs, were ranked by dval, and binned into three categories: 1)  
170 Candidate essential genes,  $dval \leq 0.01$ , indicating very low representation in the  
171 sequencing reaction; 2) fitness compromised,  $0.01 \leq dval < 0.1$ ; and 3) unaffected,  
172  $dval > 0.1$ . That is, candidate essential genes were identified as genes into which  
173 transposon insertion was not tolerated, and as a result no reads were mapped  
174 ( $dval = 0$ ), or where sequencing reads were obtained at less than 1% of the  
175 frequency predicted based on gene size (allowing for example for a rare insertion  
176 at the 3' end of a gene). Genes encoding products that were not defined as  
177 essential, but were clearly selected against in the population (Fitness  
178 compromised), possessed reads of transposon insertions at a rate ranging from  
179 1% of expected to 10% of expected. This group, as well as genes into which  
180 insertions occurred without large fitness cost, were re-examined to identify  
181 additional genes that, irrespective of the number of sequencing reads obtained,  
182 possessed improbably low numbers of transposons insertions. The goal was to  
183 cull out genes that may encode essential products, but into which insertions near  
184 the sequence encoding the amino terminus or C-terminus of a protein were



185 tolerated. For this manual curation, genes identified as “fitness compromised”  
186 and “unaffected” were re-sorted based upon transposon density (tn\_density),  
187 which was calculated by dividing the number of unique transposon insertions by  
188 the length of the open reading frame. Genes possessing a tn\_density below  
189 0.00285 (1 insertion every 350 bp, approximately 1/10<sup>th</sup> the expected rate of  
190 insertion) were manually added to the candidate essential gene list. Therefore,  
191 the candidate essential gene list consists of genes for which transposon insertion  
192 reads occurred at ≤1% compared to the overall library pool (dval), and those with  
193 a transposon density ≤10% of the predicted frequency (tn\_density). This analysis  
194 was conducted for the sequencing analysis of DNA obtained from each culture  
195 condition. To insure against anomalies deriving from irreproducible variation in a  
196 given analysis, dval and tn\_density values were averaged for 2 independent  
197 biological replicates prior to analysis and curation. Since considerable variance  
198 between abscess replicates was seen, essential genes were curated for each  
199 replicate individually and only those genes which were found in both replicates  
200 have been further analyzed. Candidate essential gene sets were then compared  
201 across growth conditions. The web-based software tool Essentials, was used to  
202 determine the statistical validity of Tn-seq results (4).

203

204 **Xylose inducible antisense RNA.** To verify Tn-seq results, select candidate  
205 essential genes were individually examined by expressing an inducible antisense  
206 RNA, and testing for growth inhibition. Target genes of interest were specifically  
207 amplified and cloned in the antisense orientation into a xylose inducible vector.

208 Depending on gene length, either the entire length, if <1kb, or the first 1 – 1.4 kb  
209 of an open reading frame, and the native ribosome-binding site, were amplified  
210 by PCR, using specific primers that included either EcoRI or KpnI restriction sites  
211 for cloning (Table S4). Efforts were taken to avoid any overlap between adjacent  
212 open reading frames. Following restriction digest, amplicons were cloned into the  
213 pEPSA5 vector (13), for expression in the antisense direction under a xylose  
214 inducible promoter. Ligated constructs were initially transformed into *E. coli* DH5-  
215 alpha and verified by sequence analysis. Purified recombinant plasmid was then  
216 transformed into the transformable *S. aureus* NCTC8325-4 derivative, RN4220,  
217 and plated on LB agar supplemented with 0.2% glucose (LBG) and 15 µg/mL  
218 chloramphenicol. Growth curves were carried out utilizing RN4220 strains with  
219 gene-specific antisense fragment or empty vector as follows. Overnight cultures  
220 were diluted 1:100 in LB supplemented with 0.2% glucose and 60 µg/mL  
221 chloramphenicol. At an approximate O.D.<sub>600</sub> of 0.2, cultures were diluted such  
222 that approximately 100 cells were inoculated in triplicate into inducing (4%  
223 xylose) or non-inducing LB supplemented with 0.2% glucose and 60 µg/mL  
224 chloramphenicol in 200 µL total volume in a microtiter plate. Growth was followed  
225 for 20 h by measuring O.D.<sub>600</sub> on a Biochrom WPA spectrophotometer  
226 (Biochrom, Holliston, MA).

227

## 228 **References**

- 229 1. **Diep BA, Gill SR, Chang RF, Phan TH, Chen JH, Davidson MG, Lin F,**  
230 **Lin J, Carleton HA, Mongodin EF, Sensabaugh GF, Perdreaux**

231 **Remington F.** 2006. Complete genome sequence of USA300, an  
232 epidemic clone of community-acquired meticillin-resistant *Staphylococcus*  
233 *aureus*. Lancet **367**:731-739.

234 2. **Herbert S, Ziebandt AK, Ohlsen K, Schafer T, Hecker M, Albrecht D,**  
235 **Novick R, Gotz F.** 2010. Repair of global regulators in *Staphylococcus*  
236 *aureus* 8325 and comparative analysis with other clinical isolates. Infect  
237 Immun **78**:2877-2889.

238 3. **Jett BD, Hatter KL, Huycke MM, Gilmore MS.** 1997. Simplified agar  
239 plate method for quantifying viable bacteria. Biotechniques **23**:648-650.

240 4. **Zomer A, Burghout P, Bootsma HJ, Hermans PW, van Hijum SA.**  
241 2012. ESSENTIALS: software for rapid analysis of high throughput  
242 transposon insertion sequencing data. PLoS One **7**:e43012.

243
