# Supplementary material for: Genes Contributing to Staphylococcus aureus Fitness in Abscess- and Infection-Related Ecologies
Source: PubMed Central journal article supplement — mBio. 2014 Sep 2;5(5):e01729-14. doi: 10.1128/mBio.01729-14 (PMC4173792; doi:10.1128/mbio.01729-14), 2014-09-02
Supplement: mbo999101979sf1.pdf [file mbo999101979sf1.pdf]

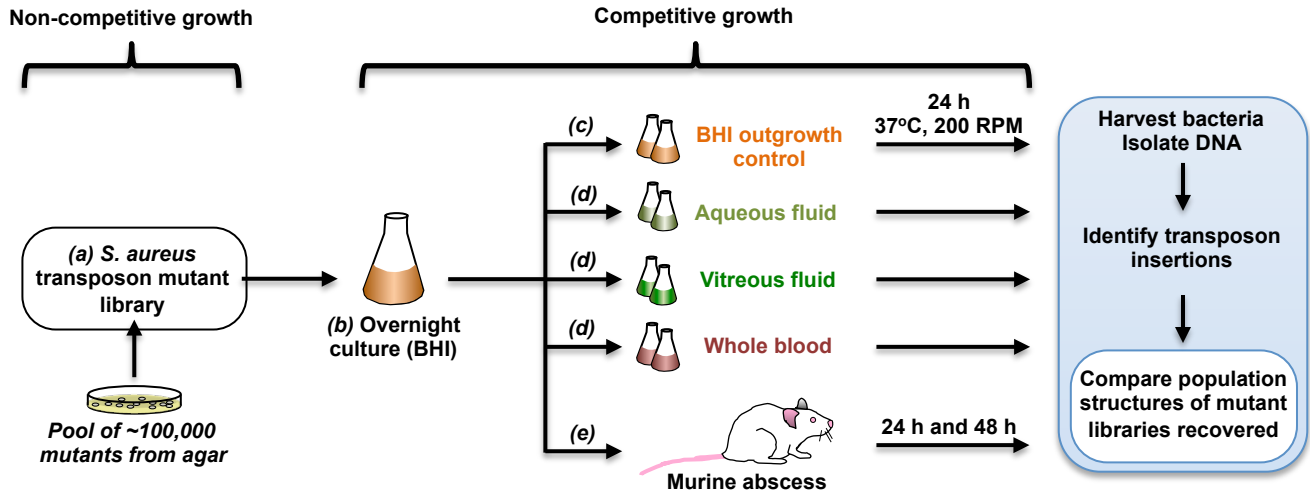

**Figure S1. Experimental strategy to determine genes essential for fitness in competitive, infection-relevant contexts.** The transposon mutant pool (a) was first cultured in nutrient broth (b) to generate a reproducible inoculum for subsequent experiments. To identify genes contributing to fitness in infection, bacteria were inoculated in duplicate *ex vivo* into aqueous fluid, vitreous fluid and whole blood (d). Additionally, genes contributing to persistence and proliferation in an abscess *in vivo* (e) were identified. Each output was sequenced and compared to nutrient broth outgrowth control (c).
