# Supplementary material for: Genes Contributing to Staphylococcus aureus Fitness in Abscess- and Infection-Related Ecologies
Source: PubMed Central journal article supplement — mBio. 2014 Sep 2;5(5):e01729-14. doi: 10.1128/mBio.01729-14 (PMC4173792; doi:10.1128/mbio.01729-14), 2014-09-02
Supplement: mbo999101979sf2.pdf [file mbo999101979sf2.pdf]

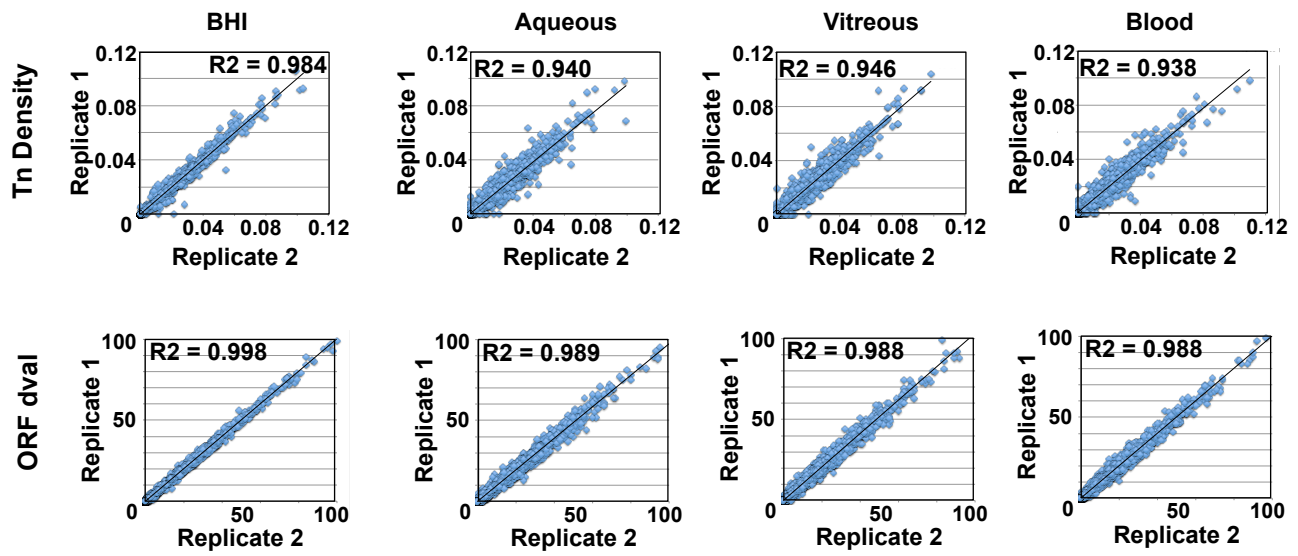

**Figure S2. Reproducibility of biological replicates.** Regression statistics for independent biological replicates. Transposon density is the number of transposon insertions per kilobase, calculated independently for each ORF. Dval is the number of transposon insertions found in a given ORF versus the number expected based on the size of the ORF.
