# Supplementary material for: Genes Contributing to Staphylococcus aureus Fitness in Abscess- and Infection-Related Ecologies
Source: PubMed Central journal article supplement — mBio. 2014 Sep 2;5(5):e01729-14. doi: 10.1128/mBio.01729-14 (PMC4173792; doi:10.1128/mbio.01729-14), 2014-09-02
Supplement: mbo999101979sf3.pdf [file mbo999101979sf3.pdf]

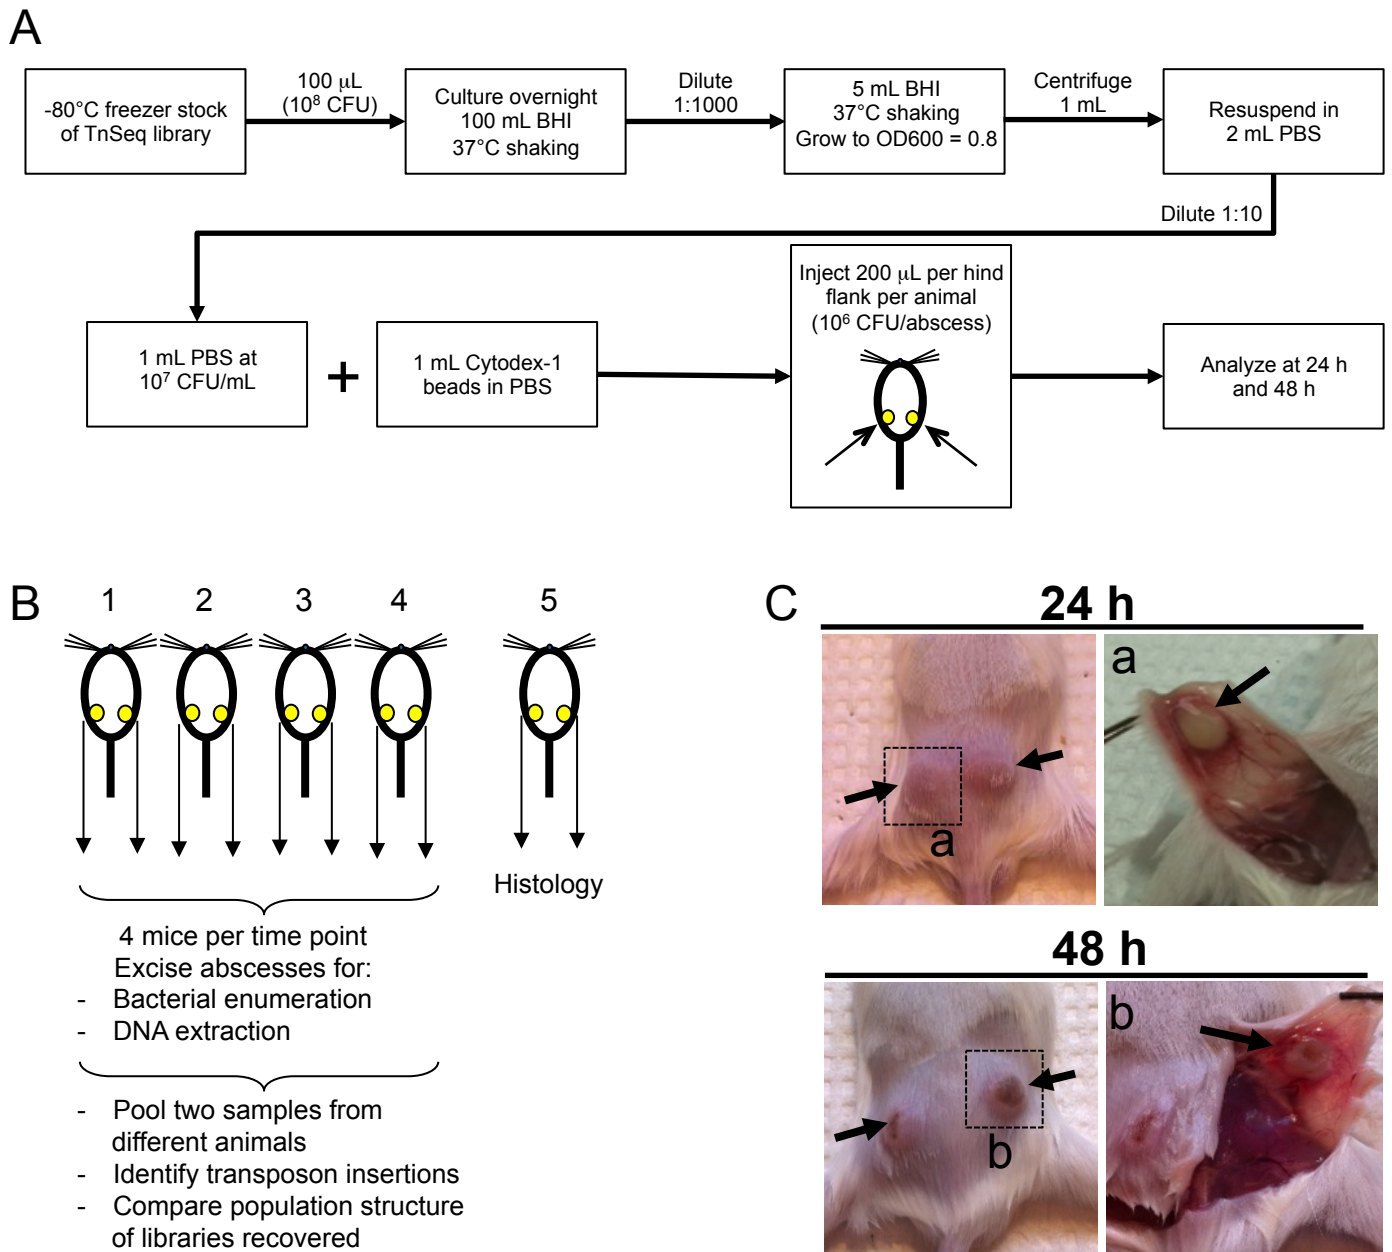

**Figure S3. Analysis of *mariner* mutant population changes in murine abscess by Tn-seq.** (A) Flowchart of experimental strategy. (B) Analyses performed (abscesses generated on hind flank illustrated in yellow). (C) Representative abscesses at 24 h (a) and 48 h (b) prior to excision.
