# Supplementary material for: Genes Contributing to Staphylococcus aureus Fitness in Abscess- and Infection-Related Ecologies
Source: PubMed Central journal article supplement — mBio. 2014 Sep 2;5(5):e01729-14. doi: 10.1128/mBio.01729-14 (PMC4173792; doi:10.1128/mbio.01729-14), 2014-09-02
Supplement: mbo999101979st1.pdf [file mbo999101979st1.pdf]

| Accession   | Gene Name                                          | Function                                                       | Score |
|-------------|----------------------------------------------------|----------------------------------------------------------------|-------|
| SIADHC_0284 | Metalloproteinase                                  | SIADHC_0284 Metalloproteinase                                  | 1238  |
| SIADHC_0285 | Unknown                                            | SIADHC_0285 Unknown                                            | 969   |
| SIADHC_0286 | Surface Associated, Protein Export and Transporter | SIADHC_0286 Surface Associated, Protein Export and Transporter | 1000  |
| SIADHC_0287 | Unknown                                            | SIADHC_0287 Unknown                                            | 1000  |
| SIADHC_0288 | Unknown                                            | SIADHC_0288 Unknown                                            | 1000  |
| SIADHC_0289 | Unknown                                            | SIADHC_0289 Unknown                                            | 1000  |
| SIADHC_0290 | Unknown                                            | SIADHC_0290 Unknown                                            | 1000  |
| SIADHC_0291 | Unknown                                            | SIADHC_0291 Unknown                                            | 1000  |
| SIADHC_0292 | Unknown                                            | SIADHC_0292 Unknown                                            | 1000  |
| SIADHC_0293 | Unknown                                            | SIADHC_0293 Unknown                                            | 1000  |
| SIADHC_0294 | Unknown                                            | SIADHC_0294 Unknown                                            | 1000  |
| SIADHC_0295 | Unknown                                            | SIADHC_0295 Unknown                                            | 1000  |
| SIADHC_0296 | Unknown                                            | SIADHC_0296 Unknown                                            | 1000  |
| SIADHC_0297 | Unknown                                            | SIADHC_0297 Unknown                                            | 1000  |
| SIADHC_0298 | Unknown                                            | SIADHC_0298 Unknown                                            | 1000  |
| SIADHC_0299 | Unknown                                            | SIADHC_0299 Unknown                                            | 1000  |
| SIADHC_0300 | Unknown                                            | SIADHC_0300 Unknown                                            | 1000  |
| SIADHC_0301 | Unknown                                            | SIADHC_0301 Unknown                                            | 1000  |
| SIADHC_0302 | Unknown                                            | SIADHC_0302 Unknown                                            | 1000  |
| SIADHC_0303 | Unknown                                            | SIADHC_0303 Unknown                                            | 1000  |
| SIADHC_0304 | Unknown                                            | SIADHC_0304 Unknown                                            | 1000  |
| SIADHC_0305 | Unknown                                            | SIADHC_0305 Unknown                                            | 1000  |
| SIADHC_0306 | Unknown                                            | SIADHC_0306 Unknown                                            | 1000  |
| SIADHC_0307 | Unknown                                            | SIADHC_0307 Unknown                                            | 1000  |
| SIADHC_0308 | Unknown                                            | SIADHC_0308 Unknown                                            | 1000  |
| SIADHC_0309 | Unknown                                            | SIADHC_0309 Unknown                                            | 1000  |
| SIADHC_0310 | Unknown                                            | SIADHC_0310 Unknown                                            | 1000  |
| SIADHC_0311 | Unknown                                            | SIADHC_0311 Unknown                                            | 1000  |
| SIADHC_0312 | Unknown                                            | SIADHC_0312 Unknown                                            | 1000  |
| SIADHC_0313 | Unknown                                            | SIADHC_0313 Unknown                                            | 1000  |
| SIADHC_0314 | Unknown                                            | SIADHC_0314 Unknown                                            | 1000  |
| SIADHC_0315 | Unknown                                            | SIADHC_0315 Unknown                                            | 1000  |
| SIADHC_0316 | Unknown                                            | SIADHC_0316 Unknown                                            | 1000  |
| SIADHC_0317 | Unknown                                            | SIADHC_0317 Unknown                                            | 1000  |
| SIADHC_0318 | Unknown                                            | SIADHC_0318 Unknown                                            | 1000  |
| SIADHC_0319 | Unknown                                            | SIADHC_0319 Unknown                                            | 1000  |
| SIADHC_0320 | Unknown                                            | SIADHC_0320 Unknown                                            | 1000  |
| SIADHC_0321 | Unknown                                            | SIADHC_0321 Unknown                                            | 1000  |
| SIADHC_0322 | Unknown                                            | SIADHC_0322 Unknown                                            | 1000  |
| SIADHC_0323 | Unknown                                            | SIADHC_0323 Unknown                                            | 1000  |
| SIADHC_0324 | Unknown                                            | SIADHC_0324 Unknown                                            | 1000  |
| SIADHC_0325 | Unknown                                            | SIADHC_0325 Unknown                                            | 1000  |
| SIADHC_0326 | Unknown                                            | SIADHC_0326 Unknown                                            | 1000  |
| SIADHC_0327 | Unknown                                            | SIADHC_0327 Unknown                                            | 1000  |
| SIADHC_0328 | Unknown                                            | SIADHC_0328 Unknown                                            | 1000  |
| SIADHC_0329 | Unknown                                            | SIADHC_0329 Unknown                                            | 1000  |
| SIADHC_0330 | Unknown                                            | SIADHC_0330 Unknown                                            | 1000  |
| SIADHC_0331 | Unknown                                            | SIADHC_0331 Unknown                                            | 1000  |
| SIADHC_0332 | Unknown                                            | SIADHC_0332 Unknown                                            | 1000  |
| SIADHC_0333 | Unknown                                            | SIADHC_0333 Unknown                                            | 1000  |
| SIADHC_0334 | Unknown                                            | SIADHC_0334 Unknown                                            | 1000  |
| SIADHC_0335 | Unknown                                            | SIADHC_0335 Unknown                                            | 1000  |
| SIADHC_0336 | Unknown                                            | SIADHC_0336 Unknown                                            | 1000  |
| SIADHC_0337 | Unknown                                            | SIADHC_0337 Unknown                                            | 1000  |
| SIADHC_0338 | Unknown                                            | SIADHC_0338 Unknown                                            | 1000  |
| SIADHC_0339 | Unknown                                            | SIADHC_0339 Unknown                                            | 1000  |
| SIADHC_0340 | Unknown                                            | SIADHC_0340 Unknown                                            | 1000  |
| SIADHC_0341 | Unknown                                            | SIADHC_0341 Unknown                                            | 1000  |
| SIADHC_0342 | Unknown                                            | SIADHC_0342 Unknown                                            | 1000  |
| SIADHC_0343 | Unknown                                            | SIADHC_0343 Unknown                                            | 1000  |
| SIADHC_0344 | Unknown                                            | SIADHC_0344 Unknown                                            | 1000  |
| SIADHC_0345 | Unknown                                            | SIADHC_0345 Unknown                                            | 1000  |
| SIADHC_0346 | Unknown                                            | SIADHC_0346 Unknown                                            | 1000  |
| SIADHC_0347 | Unknown                                            | SIADHC_0347 Unknown                                            | 1000  |
| SIADHC_0348 | Unknown                                            | SIADHC_0348 Unknown                                            | 1000  |
| SIADHC_0349 | Unknown                                            | SIADHC_0349 Unknown                                            | 1000  |
| SIADHC_0350 | Unknown                                            | SIADHC_0350 Unknown                                            | 1000  |

Table with 6 columns: ID (e.g., SMOHC\_0001), Gene Name (e.g., SMOHC\_0001), Protein Name (e.g., SMOHC\_0001), and other columns. The table lists numerous genes and their associated protein names, such as SMOHC\_0001, SMOHC\_0002, SMOHC\_0003, etc., up to SMOHC\_1182.

Table with 15 columns of numerical data. The first column is the protein name, and the subsequent 14 columns contain numerical values representing different parameters or measurements for each protein.

Table with 15 columns of numerical data, continuing from the previous table. The first column is the protein name, and the subsequent 14 columns contain numerical values.
