# Supplementary material for: Genes Contributing to Staphylococcus aureus Fitness in Abscess- and Infection-Related Ecologies
Source: PubMed Central journal article supplement — mBio. 2014 Sep 2;5(5):e01729-14. doi: 10.1128/mBio.01729-14 (PMC4173792; doi:10.1128/mbio.01729-14), 2014-09-02
Supplement: mbo999101979st2.pdf [file mbo999101979st2.pdf]

**Table S2. Comparison of genes curated as essential after growth in BHI in this study compared to previous study of essentiality in *S. aureus***

| Locus         | Product                                               | Essential in BHI<br>by TnSeq <sup>1</sup> | Essential in<br><i>S.aureus</i> list <sup>2</sup> |
|---------------|-------------------------------------------------------|-------------------------------------------|---------------------------------------------------|
| SAOUHSC_00022 | * hypothetical protein                                |                                           |                                                   |
| SAOUHSC_00486 | * hypothetical protein                                |                                           |                                                   |
| SAOUHSC_01239 | * hypothetical protein                                |                                           |                                                   |
| SAOUHSC_01857 | * hypothetical protein                                |                                           |                                                   |
| SAOUHSC_02383 | * hypothetical protein                                |                                           |                                                   |
| SAOUHSC_00889 | * monovalent cation/H+ antiporter subunit A           |                                           |                                                   |
| SAOUHSC_01263 | * phosphodiesterase                                   |                                           |                                                   |
| SAOUHSC_01203 | * ribonuclease III                                    |                                           |                                                   |
| SAOUHSC_01698 | hypothetical protein                                  |                                           |                                                   |
| SAOUHSC_00017 | 50S ribosomal protein L9                              |                                           |                                                   |
| SAOUHSC_00985 | naphthoate synthase                                   |                                           |                                                   |
| SAOUHSC_01487 | ubiquinone/menaquinone biosynthesis methyltransferase |                                           |                                                   |
| SAOUHSC_00374 | inosine-5'-monophosphate dehydrogenase                |                                           |                                                   |
| SAOUHSC_00884 | putative monovalent cation/H+ antiporter subunit F    |                                           |                                                   |
| SAOUHSC_00886 | putative monovalent cation/H+ antiporter subunit D    |                                           |                                                   |
| SAOUHSC_00887 | putative monovalent cation/H+ antiporter subunit C    |                                           |                                                   |
| SAOUHSC_00888 | putative monovalent cation/H+ antiporter subunit B    |                                           |                                                   |
| SAOUHSC_01483 | chorismate synthase                                   |                                           |                                                   |
| SAOUHSC_01772 | delta-aminolevulinic acid dehydratase                 |                                           |                                                   |
| SAOUHSC_01773 | uroporphyrinogen III synthase                         |                                           |                                                   |
| SAOUHSC_01774 | porphobilinogen deaminase                             |                                           |                                                   |
| SAOUHSC_00023 | hypothetical protein                                  |                                           |                                                   |
| SAOUHSC_00038 | hypothetical protein                                  |                                           |                                                   |
| SAOUHSC_00100 | deoxyribose-phosphate aldolase                        |                                           |                                                   |
| SAOUHSC_00112 | IS200 family transposase                              |                                           |                                                   |
| SAOUHSC_00275 | hypothetical protein                                  |                                           |                                                   |
| SAOUHSC_00396 | hypothetical protein                                  |                                           |                                                   |
| SAOUHSC_00453 | hypothetical protein                                  |                                           |                                                   |
| SAOUHSC_00473 | hypothetical protein                                  |                                           |                                                   |
| SAOUHSC_00481 | hypothetical protein                                  |                                           |                                                   |
| SAOUHSC_00526 | putative ribosomal protein L7Ae-like                  |                                           |                                                   |
| SAOUHSC_00573 | putative heme peroxidase                              |                                           |                                                   |
| SAOUHSC_00610 | hypothetical protein                                  |                                           |                                                   |
| SAOUHSC_00680 | hypothetical protein                                  |                                           |                                                   |
| SAOUHSC_00735 | hypothetical protein                                  |                                           |                                                   |
| SAOUHSC_00778 | hypothetical protein                                  |                                           |                                                   |
| SAOUHSC_00786 | hypothetical protein                                  |                                           |                                                   |
| SAOUHSC_00794 | glycolytic operon regulator                           |                                           |                                                   |
| SAOUHSC_00819 | hypothetical protein                                  |                                           |                                                   |
| SAOUHSC_00857 | hypothetical protein                                  |                                           |                                                   |
| SAOUHSC_00867 | hypothetical protein                                  |                                           |                                                   |
| SAOUHSC_00885 | putative monovalent cation/H+ antiporter subunit E    |                                           |                                                   |
| SAOUHSC_00896 | hypothetical protein                                  |                                           |                                                   |
| SAOUHSC_00938 | hypothetical protein                                  |                                           |                                                   |
| SAOUHSC_00939 | hypothetical protein                                  |                                           |                                                   |
| SAOUHSC_00981 | hypothetical protein                                  |                                           |                                                   |
| SAOUHSC_01003 | hypothetical protein                                  |                                           |                                                   |
| SAOUHSC_01023 | hypothetical protein                                  |                                           |                                                   |
| SAOUHSC_01118 | hypothetical protein                                  |                                           |                                                   |







|               |                                                                          |  |  |
|---------------|--------------------------------------------------------------------------|--|--|
| SAOUHSC_00018 | replicative DNA helicase                                                 |  |  |
| SAOUHSC_00020 | two-component response regulator                                         |  |  |
| SAOUHSC_00021 | sensory box histidine kinase VicK                                        |  |  |
| SAOUHSC_00223 | teichoic acid biosynthesis protein F                                     |  |  |
| SAOUHSC_00225 | 2-C-methyl-D-erythritol 4-phosphate cytidylyltransferase                 |  |  |
| SAOUHSC_00226 | hypothetical protein                                                     |  |  |
| SAOUHSC_00227 | hypothetical protein                                                     |  |  |
| SAOUHSC_00345 | hypothetical protein                                                     |  |  |
| SAOUHSC_00348 | 30S ribosomal protein S6                                                 |  |  |
| SAOUHSC_00349 | bacteriophage L54a, single-stranded DNA binding protein                  |  |  |
| SAOUHSC_00375 | GMP synthase                                                             |  |  |
| SAOUHSC_00442 | DNA polymerase III subunits gamma and tau                                |  |  |
| SAOUHSC_00444 | hypothetical protein                                                     |  |  |
| SAOUHSC_00451 | thymidylate kinase                                                       |  |  |
| SAOUHSC_00454 | DNA polymerase III subunit delta'                                        |  |  |
| SAOUHSC_00461 | methionyl-tRNA synthetase                                                |  |  |
| SAOUHSC_00471 | bifunctional N-acetylglucosamine-1-phosphate uridyltransferase/glucosami |  |  |
| SAOUHSC_00472 | ribose-phosphate pyrophosphokinase                                       |  |  |
| SAOUHSC_00475 | peptidyl-tRNA hydrolase                                                  |  |  |
| SAOUHSC_00482 | hypothetical protein                                                     |  |  |
| SAOUHSC_00484 | hypothetical protein                                                     |  |  |
| SAOUHSC_00489 | dihydropteroate synthase                                                 |  |  |
| SAOUHSC_00490 | dihydroneopterin aldolase                                                |  |  |
| SAOUHSC_00491 | 2-amino-4-hydroxy-6- hydroxymethyldihydropteridine pyrophosphokinase     |  |  |
| SAOUHSC_00493 | lysyl-tRNA synthetase                                                    |  |  |
| SAOUHSC_00509 | glutamyl-tRNA synthetase                                                 |  |  |
| SAOUHSC_00510 | serine acetyltransferase                                                 |  |  |
| SAOUHSC_00511 | cysteinyl-tRNA synthetase                                                |  |  |
| SAOUHSC_00516 | preprotein translocase subunit SecE                                      |  |  |
| SAOUHSC_00518 | 50S ribosomal protein L11                                                |  |  |
| SAOUHSC_00519 | 50S ribosomal protein L1                                                 |  |  |
| SAOUHSC_00520 | 50S ribosomal protein L10                                                |  |  |
| SAOUHSC_00521 | 50S ribosomal protein L7/L12                                             |  |  |
| SAOUHSC_00524 | DNA-directed RNA polymerase subunit beta                                 |  |  |
| SAOUHSC_00525 | DNA-directed RNA polymerase subunit beta'                                |  |  |
| SAOUHSC_00527 | 30S ribosomal protein S12                                                |  |  |
| SAOUHSC_00528 | 30S ribosomal protein S7                                                 |  |  |
| SAOUHSC_00529 | elongation factor G                                                      |  |  |
| SAOUHSC_00530 | elongation factor Tu                                                     |  |  |
| SAOUHSC_00549 | putative GTP cyclohydrolase                                              |  |  |
| SAOUHSC_00574 | phosphotransacetylase                                                    |  |  |
| SAOUHSC_00577 | mevalonate kinase                                                        |  |  |
| SAOUHSC_00578 | mevalonate diphosphate decarboxylase                                     |  |  |
| SAOUHSC_00579 | phosphomevalonate kinase                                                 |  |  |
| SAOUHSC_00611 | arginyl-tRNA synthetase                                                  |  |  |
| SAOUHSC_00640 | teichoic acid biosynthesis protein                                       |  |  |
| SAOUHSC_00641 | teichoic acids export protein ATP-binding subunit                        |  |  |
| SAOUHSC_00642 | teichoic acid biosynthesis protein                                       |  |  |
| SAOUHSC_00643 | tagB protein                                                             |  |  |
| SAOUHSC_00728 | hypothetical protein                                                     |  |  |
| SAOUHSC_00741 | ribonucleotide reductase stimulatory protein                             |  |  |
| SAOUHSC_00742 | ribonucleotide-diphosphate reductase subunit alpha                       |  |  |
| SAOUHSC_00743 | ribonucleotide-diphosphate reductase subunit beta                        |  |  |











|               |                                     |  |  |
|---------------|-------------------------------------|--|--|
| SAOUHSC_02507 | 50S ribosomal protein L22           |  |  |
| SAOUHSC_02508 | 30S ribosomal protein S19           |  |  |
| SAOUHSC_02509 | 50S ribosomal protein L2            |  |  |
| SAOUHSC_02510 | 50S ribosomal protein L23           |  |  |
| SAOUHSC_02511 | 50S ribosomal protein L4            |  |  |
| SAOUHSC_02512 | 50S ribosomal protein L3            |  |  |
| SAOUHSC_02527 | FmhB protein                        |  |  |
| SAOUHSC_02571 | secretory antigen                   |  |  |
| SAOUHSC_02623 | isopentenyl pyrophosphate isomerase |  |  |
| SAOUHSC_02720 | hypothetical protein                |  |  |
| SAOUHSC_02860 | HMG-CoA synthase                    |  |  |
| SAOUHSC_03054 | ribonuclease P                      |  |  |
| SAOUHSC_03055 | 50S ribosomal protein L34           |  |  |

<sup>1</sup> Genes that met essential criteria after growth in BHI in this study

<sup>2</sup> Gene list curated as essential in *S. aureus* by Chaudhuri et al (BMC Genomics 2009)

\* Selected for validation by antisense in this study

Essential genes (dark gray) or Fitness compromised genes (light gray) are shown here (white=not-essential or compromised in condition)
