# Supplementary material for: Genes Contributing to Staphylococcus aureus Fitness in Abscess- and Infection-Related Ecologies
Source: PubMed Central journal article supplement — mBio. 2014 Sep 2;5(5):e01729-14. doi: 10.1128/mBio.01729-14 (PMC4173792; doi:10.1128/mbio.01729-14), 2014-09-02
Supplement: mbo999101979st3.pdf [file mbo999101979st3.pdf]

|                |                                                         |  |  |  |  |       |       |         |       |       |         |       |       |         |       |       |         |       |       |         |
|----------------|---------------------------------------------------------|--|--|--|--|-------|-------|---------|-------|-------|---------|-------|-------|---------|-------|-------|---------|-------|-------|---------|
| SAOUIHSC_01606 | peptidase T                                             |  |  |  |  | 0.777 | 0.470 | 8.9E-01 | 0.163 | 0.062 | 5.6E-01 | 1.315 | 0.039 | 8.2E-02 | 0.814 | 0.139 | 3.5E-01 | 0.973 | 0.028 | 2.5E-01 |
| SAOUIHSC_01658 | endonuclease IV                                         |  |  |  |  | 1.124 | 1.298 | 3.6E-01 | 0.152 | 0.078 | 1.0E-01 | 0.767 | 0.356 | 2.9E-02 | 1.044 | 0.090 | 4.2E-02 | 1.087 | 0.288 | 9.6E-02 |
| SAOUIHSC_02358 | HenK family modification methylase                      |  |  |  |  | 0.425 | 0.187 | 7.7E-01 | 0.104 | 0.044 | 5.1E-01 | 1.208 | 0.099 | 6.8E-02 | 0.711 | 0.237 | 6.4E-01 | 0.350 | 0.225 | 6.4E-01 |
| SAOUIHSC_01248 | tRNA pseudouridine synthase B                           |  |  |  |  | 0.132 | 0.086 | 4.2E-01 | 0.265 | 0.112 | 7.9E-01 | 1.452 | 0.049 | 2.2E-02 | 0.885 | 0.075 | 1.6E-01 | 1.279 | 0.065 | 3.0E-02 |
| SAOUIHSC_01328 | SOS ribosomal protein L33                               |  |  |  |  | 0.152 | 0.019 | 6.0E-02 | 0.387 | 0.121 | 6.1E-01 | 0.739 | 0.707 | 1.5E-01 | 0.568 | 0.308 | 1.5E-01 | 1.950 | 0.066 | 2.3E-01 |
| SAOUIHSC_01469 | endonuclease III                                        |  |  |  |  | 0.063 | 0.015 | 2.3E-01 | 0.614 | 0.478 | 7.3E-01 | 1.602 | 0.216 | 4.2E-01 | 1.070 | 0.026 | 7.7E-01 | 1.516 | 0.115 | 4.5E-01 |
| SAOUIHSC_01587 | ribosomal large subunit pseudouridine synthase B        |  |  |  |  | 0.142 | 0.026 | 5.9E-01 | 0.400 | 0.314 | 8.5E-01 | 1.308 | 0.197 | 3.5E-04 | 1.098 | 0.104 | 5.5E-04 | 1.271 | 0.076 | 5.8E-04 |
| SAOUIHSC_01759 | rod shape-determining protein MrcC                      |  |  |  |  | 0.046 | 0.010 | 7.0E-02 | 0.371 | 0.340 | 2.5E-01 | 1.412 | 0.064 | 1.0E-01 | 0.652 | 0.247 | 2.0E-02 | 1.170 | 0.208 | 4.9E-02 |
| SAOUIHSC_01942 | serine protease SpaIA                                   |  |  |  |  | 0.176 | 0.025 | 5.5E-02 | 0.533 | 0.237 | 1.5E-01 | 0.526 | 0.163 | 1.0E-02 | 0.505 | 0.163 | 8.7E-03 | 0.420 | 0.143 | 4.5E-03 |
| SAOUIHSC_02299 | serine-protein kinase RsbW                              |  |  |  |  | 0.153 | 0.034 | 6.1E-01 | 1.803 | 1.639 | 1.0E-01 | 0.547 | 0.043 | 6.8E-04 | 0.916 | 0.062 | 2.6E-01 | 1.509 | 0.092 | 4.8E-11 |
| SAOUIHSC_02423 | UDP-N-acetylglucosamine pyrophosphorylase               |  |  |  |  | 0.144 | 0.022 | 2.9E-01 | 0.353 | 0.077 | 7.3E-01 | 1.370 | 0.178 | 1.6E-01 | 0.910 | 0.012 | 7.3E-01 | 1.188 | 0.043 | 3.1E-01 |
| SAOUIHSC_02441 | alkaline shock protein Z3                               |  |  |  |  | 0.131 | 0.101 | 5.5E-02 | 0.317 | 0.018 | 8.0E-02 | 1.165 | 0.189 | 8.0E-02 | 1.178 | 0.052 | 5.8E-02 | 1.068 | 0.018 | 2.8E-02 |
| SAOUIHSC_01695 | hypothetical protein                                    |  |  |  |  | 0.188 | 0.052 | 6.3E-02 | 0.227 | 0.262 | 9.0E-02 | 2.331 | 0.741 | 1.5E-01 | 1.123 | 0.955 | 3.6E-02 | 1.27  | 0.034 | 4.2E-02 |
| SAOUIHSC_01673 | hypothetical protein                                    |  |  |  |  | 0.071 | 0.025 | 2.9E-01 | 0.275 | 0.050 | 7.0E-01 | 1.386 | 0.132 | 1.0E-01 | 0.775 | 0.150 | 5.2E-01 | 1.049 | 0.035 | 2.6E-01 |
| SAOUIHSC_02013 | hypothetical protein                                    |  |  |  |  | 0.213 | 0.031 | 3.3E-02 | 0.772 | 3.782 | 8.3E-01 | 2.216 | 0.351 | 2.3E-01 | 1.307 | 0.441 | 7.0E-02 | 1.129 | 0.140 | 1.6E-02 |
| SAOUIHSC_01165 | uracil permease                                         |  |  |  |  | 0.020 | 0.013 | 3.4E-02 | 0.001 | 0.001 | 5.6E-02 | 1.824 | 0.286 | 7.6E-03 | 1.970 | 0.029 | 5.2E-02 | 3.22  | 0.372 | 6.4E-01 |
| SAOUIHSC_01967 | ABC transporter ATP-binding protein                     |  |  |  |  | 0.003 | 0.004 | 7.2E-02 | 0.022 | 0.021 | 7.7E-02 | 0.841 | 0.031 | 1.0E-02 | 1.359 | 0.141 | 6.2E-02 | 1.176 | 0.333 | 3.4E-02 |
| SAOUIHSC_02152 | ABC transporter ATP-binding protein                     |  |  |  |  | 0.036 | 0.015 | 8.7E-02 | 0.134 | 0.006 | 1.3E-01 | 1.202 | 0.125 | 1.7E-01 | 0.522 | 0.141 | 2.2E-02 | 0.401 | 0.071 | 1.4E-02 |
| SAOUIHSC_02481 | cobalt transport protein                                |  |  |  |  | 0.018 | 0.020 | 2.5E-02 | 0.002 | 0.002 | 3.0E-02 | 1.224 | 0.094 | 1.5E-03 | 0.846 | 0.050 | 6.4E-05 | 0.900 | 0.099 | 3.9E-05 |
| SAOUIHSC_02482 | cobalt transporter ATP-binding subunit                  |  |  |  |  | 0.010 | 0.009 | 1.5E-01 | 0.028 | 0.006 | 1.9E-01 | 0.898 | 0.063 | 3.6E-01 | 0.882 | 0.102 | 4.2E-01 | 1.159 | 0.284 | 6.5E-01 |
| SAOUIHSC_02483 | cobalt transporter ATP-binding subunit                  |  |  |  |  | 0.059 | 0.003 | 2.7E-02 | 0.003 | 0.003 | 4.8E-02 | 0.781 | 0.088 | 1.6E-03 | 0.824 | 0.099 | 1.6E-03 | 0.355 | 0.069 | 7.5E-04 |
| SAOUIHSC_01966 | hypothetical protein                                    |  |  |  |  | 0.119 | 0.095 | 4.3E-03 | 0.059 | 0.035 | 8.6E-03 | 0.970 | 0.430 | 7.5E-07 | 1.581 | 0.493 | 2.5E-05 | 1.629 | 0.199 | 6.6E-07 |
| SAOUIHSC_01029 | phosphoenolpyruvate-protein phosphotransferase          |  |  |  |  | 0.135 | 0.030 | 5.3E-01 | 0.125 | 0.016 | 6.7E-01 | 0.519 | 0.053 | 6.0E-01 | 1.402 | 0.044 | 5.9E-04 | 0.409 | 0.078 | 9.3E-01 |
| SAOUIHSC_01354 | sodium-alanine symporter family protein                 |  |  |  |  | 0.183 | 0.050 | 2.3E-01 | 0.120 | 0.097 | 3.6E-01 | 0.781 | 0.041 | 1.2E-16 | 0.819 | 0.700 | 1.5E-22 | 0.630 | 0.026 | 9.4E-11 |
| SAOUIHSC_01656 | hypothetical protein                                    |  |  |  |  | 0.141 | 0.079 | 1.8E-01 | 0.174 | 0.076 | 3.2E-01 | 1.076 | 0.224 | 5.9E-01 | 1.102 | 0.254 | 8.3E-01 | 1.113 | 0.147 | 8.2E-01 |
| SAOUIHSC_00670 | hypothetical protein                                    |  |  |  |  | 0.093 | 0.018 | 1.6E-01 | 0.125 | 0.014 | 2.6E-01 | 1.868 | 0.044 | 3.2E-01 | 1.773 | 0.153 | 3.8E-01 | 0.274 | 0.171 | 3.5E-01 |
| SAOUIHSC_01992 | phosphotransferase system EIC domain-containing protein |  |  |  |  | 0.099 | 0.025 | 7.6E-01 | 0.254 | 0.063 | 5.3E-01 | 1.021 | 0.049 | 6.8E-05 | 0.851 | 0.086 | 1.5E-05 | 2.021 | 0.077 | 1.0E-04 |
| SAOUIHSC_00652 | iron compound ABC transporter ATP-binding protein       |  |  |  |  | 0.088 | 0.026 | 1.1E-01 | 0.242 | 0.134 | 2.0E-01 | 1.189 | 0.327 | 1.1E-01 | 0.904 | 0.076 | 3.1E-01 | 1.068 | 0.018 | 9.6E-02 |
| SAOUIHSC_01046 | ABC transporter                                         |  |  |  |  | 0.690 | 0.365 | 9.3E-01 | 0.157 | 0.056 | 7.4E-01 | 0.700 | 0.384 | 5.9E-03 | 1.348 | 0.055 | 8.2E-04 | 1.120 | 0.169 | 8.8E-02 |
| SAOUIHSC_02389 | cation efflux family protein                            |  |  |  |  | 0.844 | 0.559 | 7.2E-01 | 0.221 | 0.003 | 7.8E-01 | 0.851 | 0.214 | 3.5E-01 | 1.031 | 0.081 | 8.5E-02 | 1.200 | 0.071 | 4.8E-02 |
| SAOUIHSC_02699 | hypothetical protein                                    |  |  |  |  | 0.694 | 0.545 | 9.9E-01 | 0.200 | 0.024 | 7.0E-01 | 0.722 | 0.066 | 3.1E-01 | 0.589 | 0.048 | 5.9E-01 | 0.688 | 0.117 | 5.8E-01 |
| SAOUIHSC_01047 | spermidine/putrescine ABC transporter permease          |  |  |  |  | 0.185 | 0.043 | 3.2E-01 | 0.407 | 0.098 | 7.5E-01 | 0.916 | 0.097 | 8.4E-01 | 0.842 | 0.043 | 8.6E-01 | 0.673 | 0.030 | 7.0E-01 |
| SAOUIHSC_01378 | peptide ABC transporter ATP-binding protein             |  |  |  |  | 0.205 | 0.050 | 6.0E-01 | 0.520 | 0.367 | 7.8E-01 | 0.795 | 0.067 | 2.8E-01 | 0.589 | 0.106 | 6.4E-01 | 0.650 | 0.220 | 4.5E-01 |
| SAOUIHSC_01657 | ABC transporter                                         |  |  |  |  | 0.066 | 0.016 | 8.3E-01 | 0.271 | 0.205 | 5.1E-01 | 1.505 | 0.191 | 1.2E-02 | 0.940 | 0.022 | 5.5E-06 | 0.788 | 0.019 | 2.3E-04 |
| SAOUIHSC_02763 | peptide ABC transporter ATP-binding protein             |  |  |  |  | 0.207 | 0.014 | 9.2E-01 | 0.368 | 0.055 | 7.2E-01 | 0.777 | 0.021 | 1.5E-02 | 0.979 | 0.023 | 9.0E-04 | 0.926 | 0.101 | 3.5E-03 |
| SAOUIHSC_02765 | nickel ABC transporter permease                         |  |  |  |  | 0.134 | 0.095 | 4.0E-01 | 0.314 | 0.029 | 8.3E-01 | 0.812 | 0.033 | 1.6E-01 | 1.118 | 0.057 | 3.8E-02 | 1.093 | 0.064 | 1.1E-01 |
| SAOUIHSC_02767 | nickel ABC transporter peptide-binding protein          |  |  |  |  | 0.062 | 0.020 | 2.3E-01 | 0.046 | 0.036 | 2.6E-01 | 0.742 | 0.067 | 7.0E-02 | 0.847 | 0.028 | 2.8E-02 | 0.928 | 0.067 | 9.2E-01 |
| SAOUIHSC_02873 | cation transporter E1-E2 family ATPase                  |  |  |  |  | 0.209 | 0.016 | 2.6E-01 | 0.405 | 0.149 | 6.2E-01 | 0.947 | 0.124 | 7.5E-01 | 1.012 | 0.208 | 7.0E-01 | 1.139 | 0.070 | 6.5E-01 |
| SAOUIHSC_00647 | hypothetical protein                                    |  |  |  |  | 0.196 | 0.050 | 3.4E-01 | 0.783 | 0.688 | 5.0E-01 | 0.689 | 0.122 | 1.3E-03 | 0.712 | 0.258 | 6.5E-01 | 1.310 | 0.275 | 1.7E-02 |
| SAOUIHSC_00084 | hypothetical protein                                    |  |  |  |  | 0.126 | 0.124 | 1.4E-02 | 0.145 | 0.015 | 9.0E-03 | 0.709 | 0.022 | 1.0E-03 | 1.621 | 0.226 | 8.1E-03 | 0.831 | 0.111 | 3.5E-04 |
| SAOUIHSC_00551 | hypothetical protein                                    |  |  |  |  | 0.093 | 0.105 | 2.1E-01 | 0.069 | 0.012 | 2.4E-01 | 0.674 | 0.168 | 5.3E-01 | 1.480 | 0.542 | 9.3E-01 | 1.009 | 0.160 | 6.9E-01 |
| SAOUIHSC_00678 | hypothetical protein                                    |  |  |  |  | 0.009 | 0.004 | 8.2E-03 | 0.155 | 0.054 | 2.7E-03 | 2.308 | 0.753 | 4.8E-03 | 0.552 | 0.144 | 2.6E-06 | 1.353 | 0.350 | 5.5E-06 |
| SAOUIHSC_00694 | hypothetical protein                                    |  |  |  |  | 0.015 | 0.015 | 9.3E-02 | 0.020 | 0.023 | 1.1E-01 | 0.754 | 0.077 | 1.2E-01 | 1.888 | 0.286 | 5.9E-01 | 1.099 | 0.030 | 1.9E-01 |
| SAOUIHSC_00941 | hypothetical protein                                    |  |  |  |  | 0.014 | 0.016 | 3.8E-02 | 0.000 | 0.000 | 3.9E-02 | 0.367 | 0.089 | 9.6E-03 | 0.385 | 0.275 | 5.9E-03 | 0.175 | 0.265 | 7.1E-03 |
| SAOUIHSC_00880 | hypothetical protein                                    |  |  |  |  | 0.016 | 0.016 | 2.7E-05 | 0.010 | 0.011 | 3.5E-02 | 0.261 | 0.361 | 1.4E-05 | 0.716 | 0.061 | 6.1E-07 | 0.170 | 0.363 | 8.3E-06 |
| SAOUIHSC_01256 | hypothetical protein                                    |  |  |  |  | 0.058 | 0.028 | 6.9E-01 | 0.030 | 0.011 | 6.2E-02 | 2.007 | 0.132 | 1.2E-06 | 0.186 | 0.107 | 6.0E-08 | 1.037 | 0.076 | 2.4E-05 |
| SAOUIHSC_01271 | hypothetical protein                                    |  |  |  |  | 0.017 | 0.017 | 2.0E-01 | 0.003 | 0.001 | 2.5E-01 | 1.955 | 0.185 | 5.6E-01 | 1.506 | 0.481 | 6.0E-01 | 0.922 | 0.218 | 6.2E-01 |
| SAOUIHSC_01353 | hypothetical protein                                    |  |  |  |  | 0.062 | 0.007 | 6.0E-02 | 0.107 | 0.044 | 1.8E-02 | 0.802 | 0.034 | 7.7E-41 | 0.927 | 0.026 | 7.0E-54 | 0.679 | 0.137 | 3.4E-28 |
| SAOUIHSC_01391 | hypothetical protein                                    |  |  |  |  | 0.138 | 0.044 | 5.9E-02 | 0.125 | 0.080 | 8.8E-02 | 2.380 | 0.145 | 7.3E-01 | 1.453 | 0.458 | 1.3E-01 | 1.418 | 0.072 | 9.9E-02 |
| SAOUIHSC_01419 | hypothetical protein                                    |  |  |  |  | 0.001 | 0.001 | 4.9E-02 | 0.020 | 0.023 | 4.4E-02 | 0.778 | 0.055 | 8.5E-05 | 0.379 | 0.142 | 2.2E-04 | 1.138 | 0.059 | 3.8E-04 |
| SAOUIHSC_01422 | hypothetical protein                                    |  |  |  |  | 0.000 | 0.000 | 1.1E-01 | 0.106 | 0.122 | 1.2E-01 | 2.268 | 0.519 | 7.3E-01 | 0.706 | 0.051 | 7.3E-02 | 1.767 | 0.070 | 2.8E-01 |
| SAOUIHSC_02775 | hypothetical protein                                    |  |  |  |  | 0.183 | 0.078 | 6.5E-04 | 0.000 | 0.000 | 6.2E-04 | 0.688 | 0.219 | 1.1E-04 | 0.021 | 0.136 | 5.1E-05 | 3.727 | 0.177 | 1.9E-02 |
| SAOUIHSC_02660 | hypothetical protein                                    |  |  |  |  | 0.115 | 0.072 | 7.7E-02 | 0.105 | 0.017 | 1.4E-01 | 1.174 | 0.092 | 1.3E-01 | 1.183 | 0.070 | 1.1E-01 | 1.242 | 0.089 | 1.8E-01 |
| SAOUIHSC_02853 | hypothetical protein                                    |  |  |  |  | 0.066 | 0.071 | 3.9E-01 | 0.089 | 0.036 | 5.9E-01 | 1.172 | 0.440 | 7.4E-01 | 1.216 | 0.262 | 6.5E-01 | 1.048 | 0.425 | 9.4E-01 |
| SAOUIHSC_00380 | hypothetical protein                                    |  |  |  |  | 0.000 | 0.000 | 1.1E-04 | 0.214 | 0.248 | 1.1E-05 | 0.519 | 0.026 | 2.2E-07 | 0.379 | 0.227 | 3.5E-07 | 1.039 | 0.059 | 3.2E-07 |
| SAOUIHSC_01264 | hypothetical protein                                    |  |  |  |  | 0.000 | 0.000 | 2.4E-02 | 0.150 | 0.149 | 2.6E-02 | 2.054 | 2.372 | 1.3E-01 | 3.486 | 1.077 | 2.3E-01 | 0.516 | 0.069 | 3.3E-03 |
| SAOUIHSC_01568 | hypothetical protein                                    |  |  |  |  | 0.035 | 0.042 | 3.9E-02 | 0.178 | 0.187 | 3.7E-02 | 0.599 | 0.542 | 1.5E-02 | 1.113 | 0.393 | 3.9E-02 | 0.918 | 0.236 | 1.2E-02 |
| SAOUIHSC_00369 | hypothetical protein                                    |  |  |  |  | 0.128 | 0.110 | 2.7E-01 | 0.175 | 0.104 | 4.6E-01 | 1.050 | 0.110 | 4.0E-01 | 0.747 | 0.124 | 8.7E-01 | 0.890 | 0.256 | 8.1E-01 |
| SAOUIHSC_01436 | hypothetical protein                                    |  |  |  |  | 0.240 | 0.261 | 7.8E-02 | 0.100 | 0.054 | 6.5E-02 | 0.839 | 0.440 | 4.1E-02 | 0.317 | 0.236 | 1.8E-02 | 0.811 | 0.610 | 2.3E-02 |
| SAOUIHSC_01860 | hypothetical protein                                    |  |  |  |  | 0.179 | 0.103 | 6.3E-01 | 0.008 | 0.002 | 5.3E-0  |       |       |         |       |       |         |       |       |         |

|               |                                            |  |  |  |  |        |        |         |        |        |         |        |        |         |        |        |         |        |        |         |
|---------------|--------------------------------------------|--|--|--|--|--------|--------|---------|--------|--------|---------|--------|--------|---------|--------|--------|---------|--------|--------|---------|
| SAOUHSC_00798 | phosphoglyceromutase                       |  |  |  |  | 1.202  | 0.411  | 1.2E-01 | 5.140  | 0.100  | 9.8E-01 | 3.133  | 0.703  | 1.9E-01 | 4.266  | 0.175  | 6.2E-01 | 4.159  | 0.119  | 5.8E-01 |
| SAOUHSC_01065 | heme A synthase                            |  |  |  |  | 0.048  | 0.056  | 4.2E-06 | 4.253  | 0.622  | 4.7E-04 | 21.504 | 4.628  | 1.9E-02 | 8.469  | 2.472  | 4.6E-05 | 12.856 | 2.249  | 6.5E-04 |
| SAOUHSC_01037 | hypothetical protein                       |  |  |  |  | 0.000  | 0.000  | 1.4E-05 | 1.315  | 1.545  | 3.9E-06 | 18.817 | 18.551 | 3.8E-02 | 9.619  | 1.524  | 7.1E-03 | 5.124  | 1.181  | 2.0E-04 |
| SAOUHSC_01068 | hypothetical protein                       |  |  |  |  | 4.312  | 2.115  | 2.6E-02 | 18.114 | 12.387 | 3.0E-01 | 5.055  | 2.114  | 1.6E-03 | 6.638  | 3.775  | 8.4E-03 | 6.431  | 1.806  | 4.1E-03 |
| SAOUHSC_01659 | hypothetical protein                       |  |  |  |  | 0.014  | 0.016  | 5.3E-04 | 0.007  | 0.008  | 3.0E-04 | 9.019  | 0.574  | 7.0E-03 | 6.412  | 1.607  | 1.6E-05 | 4.416  | 3.452  | 1.1E-05 |
| SAOUHSC_00650 | hypothetical protein                       |  |  |  |  | 8.519  | 10.926 | 5.5E-04 | 21.610 | 27.716 | 1.9E-03 | 32.886 | 34.971 | 1.9E-02 | 22.524 | 16.678 | 1.5E-03 | 42.003 | 40.313 | 2.0E-02 |
| SAOUHSC_02838 | hypothetical protein                       |  |  |  |  | 72.967 | 78.737 | 4.6E-01 | 4.477  | 5.042  | 1.4E-03 | 5.761  | 6.237  | 3.0E-03 | 14.175 | 7.151  | 1.0E-02 | 3.811  | 1.026  | 2.6E-05 |
| SAOUHSC_00372 | xanthine phosphoribosyltransferase         |  |  |  |  | 3.965  | 1.143  | 1.4E-01 | 1.852  | 0.238  | 1.5E-02 | 4.798  | 1.305  | 7.6E-02 | 5.238  | 0.309  | 9.1E-02 | 3.713  | 0.735  | 1.9E-02 |
| SAOUHSC_00373 | xanthine permease                          |  |  |  |  | 2.050  | 0.999  | 7.8E-02 | 1.993  | 0.419  | 1.1E-01 | 4.392  | 0.279  | 2.3E-01 | 4.496  | 0.195  | 1.2E-01 | 3.140  | 0.448  | 1.9E-02 |
| SAOUHSC_00881 | hypothetical protein                       |  |  |  |  | 6.235  | 5.965  | 1.1E-01 | 1.782  | 0.086  | 5.2E-03 | 7.190  | 3.380  | 1.2E-01 | 5.157  | 2.261  | 3.7E-02 | 3.564  | 1.038  | 7.8E-03 |
| SAOUHSC_01986 | hypothetical protein                       |  |  |  |  | 0.967  | 1.156  | 8.7E-04 | 3.680  | 3.406  | 7.3E-02 | 5.118  | 4.804  | 1.1E-02 | 6.969  | 3.567  | 1.5E-02 | 1.040  | 0.981  | 9.4E-06 |
| SAOUHSC_01423 | hypothetical protein                       |  |  |  |  | 8.864  | 8.163  | 9.0E-02 | 1.475  | 0.725  | 5.4E-04 | 9.379  | 4.267  | 3.0E-02 | 3.965  | 1.182  | 2.5E-04 | 5.628  | 0.553  | 1.8E-03 |
| SAOUHSC_00807 | hypothetical protein                       |  |  |  |  | 0.000  | 0.000  | 1.5E-02 | 0.080  | 0.048  | 9.1E-03 | 1.631  | 1.830  | 8.2E-02 | 5.933  | 0.736  | 4.4E-01 | 5.956  | 5.316  | 3.8E-01 |
| SAOUHSC_02202 | hypothetical protein                       |  |  |  |  | 0.708  | 0.827  | 1.6E-02 | 2.498  | 1.210  | 2.0E-01 | 1.225  | 0.789  | 1.2E-03 | 5.959  | 0.766  | 9.6E-02 | 4.913  | 2.972  | 5.4E-02 |
| SAOUHSC_00034 | hypothetical protein                       |  |  |  |  | 37.980 | 15.019 | 1.5E-02 | 55.220 | 36.607 | 1.1E-01 | 3.666  | 4.173  | 8.3E-07 | 19.552 | 12.720 | 6.9E-06 | 18.270 | 12.542 | 3.0E-09 |
| SAOUHSC_01067 | hypothetical protein                       |  |  |  |  | 0.000  | 0.000  | 2.1E-03 | 2.604  | 0.721  | 4.2E-04 | 8.910  | 3.760  | 6.8E-04 | 15.609 | 15.644 | 1.8E-02 | 13.767 | 5.739  | 9.7E-04 |
| SAOUHSC_00998 | fnt protein                                |  |  |  |  | 7.015  | 1.867  | 9.9E-02 | 13.141 | 0.888  | 7.0E-02 | 0.697  | 0.056  | 8.4E-07 | 0.386  | 0.088  | 9.7E-03 | 0.956  | 0.030  | 2.9E-12 |
| SAOUHSC_00620 | accessory regulator A                      |  |  |  |  | 2.734  | 0.909  | 5.3E-01 | 26.350 | 12.802 | 4.7E-01 | 1.490  | 0.389  | 1.3E-01 | 2.718  | 0.371  | 4.5E-01 | 1.321  | 0.504  | 7.7E-02 |
| SAOUHSC_00536 | branched-chain amino acid aminotransferase |  |  |  |  | 4.607  | 2.590  | 9.4E-01 | 24.750 | 23.487 | 7.6E-01 | 2.175  | 0.068  | 8.8E-02 | 1.244  | 0.037  | 8.0E-04 | 1.198  | 0.236  | 5.9E-04 |
| SAOUHSC_00667 | ABC transporter ATP-binding protein        |  |  |  |  | 8.864  | 1.644  | 2.1E-01 | 13.898 | 6.288  | 1.4E-01 | 0.506  | 0.089  | 6.2E-01 | 0.583  | 0.024  | 1.8E-01 | 0.642  | 0.193  | 3.8E-01 |
| SAOUHSC_00668 | ABC transporter permease                   |  |  |  |  | 9.602  | 1.574  | 1.3E-01 | 13.209 | 0.509  | 7.2E-02 | 0.629  | 0.001  | 5.8E-06 | 0.723  | 0.019  | 1.8E-07 | 0.833  | 0.007  | 8.7E-08 |
| SAOUHSC_02834 | sortase                                    |  |  |  |  | 2.000  | 0.306  | 2.3E-01 | 8.289  | 4.192  | 7.7E-01 | 1.317  | 0.468  | 5.8E-03 | 1.602  | 0.321  | 9.6E-03 | 1.917  | 0.132  | 1.4E-02 |
| SAOUHSC_00665 | hypothetical protein                       |  |  |  |  | 9.219  | 1.444  | 1.9E-01 | 19.663 | 5.741  | 1.4E-01 | 0.662  | 0.112  | 1.4E-01 | 0.852  | 0.054  | 3.6E-02 | 0.891  | 0.149  | 5.0E-02 |
| SAOUHSC_00666 | hypothetical protein                       |  |  |  |  | 7.282  | 1.799  | 2.5E-01 | 14.630 | 5.385  | 2.0E-01 | 0.653  | 0.038  | 4.4E-01 | 0.852  | 0.034  | 2.0E-01 | 0.803  | 0.080  | 3.0E-01 |
| SAOUHSC_02664 | transcriptional regulator                  |  |  |  |  | 3.737  | 0.071  | 4.5E-01 | 5.648  | 1.286  | 2.5E-01 | 0.566  | 0.021  | 3.6E-01 | 1.620  | 0.097  | 1.5E-01 | 0.934  | 0.057  | 8.3E-01 |
| SAOUHSC_01025 | hypothetical protein                       |  |  |  |  | 4.980  | 0.305  | 5.3E-01 | 7.785  | 2.595  | 3.4E-01 | 0.746  | 0.115  | 3.3E-02 | 0.637  | 0.066  | 2.1E-02 | 0.887  | 0.029  | 5.6E-02 |
| SAOUHSC_01821 | hypothetical protein                       |  |  |  |  | 5.560  | 0.346  | 3.4E-01 | 4.968  | 1.571  | 2.5E-01 | 1.518  | 0.270  | 5.8E-01 | 1.350  | 0.353  | 3.2E-01 | 1.337  | 0.500  | 5.7E-01 |
| SAOUHSC_02961 | hypothetical protein                       |  |  |  |  | 6.183  | 5.663  | 3.9E-01 | 5.512  | 0.561  | 5.0E-01 | 1.422  | 0.237  | 2.4E-03 | 1.916  | 1.214  | 9.3E-03 | 1.164  | 0.363  | 2.9E-04 |
| SAOUHSC_00664 | hypothetical protein                       |  |  |  |  | 2.737  | 1.179  | 4.7E-01 | 8.500  | 2.319  | 2.2E-01 | 1.006  | 0.130  | 7.6E-01 | 3.391  | 0.081  | 2.7E-01 | 1.302  | 0.224  | 4.7E-01 |
| SAOUHSC_02936 | hypothetical protein                       |  |  |  |  | 1.144  | 0.344  | 3.1E-01 | 5.133  | 0.634  | 4.2E-01 | 0.916  | 0.293  | 8.0E-02 | 1.053  | 0.208  | 5.7E-02 | 1.057  | 0.056  | 1.1E-01 |
| SAOUHSC_00751 | hypothetical protein                       |  |  |  |  | 33.371 | 31.877 | 6.7E-01 | 0.677  | 0.582  | 5.0E-01 | 2.274  | 0.644  | 9.1E-01 | 1.569  | 0.763  | 7.2E-01 | 1.682  | 0.728  | 7.0E-01 |
| SAOUHSC_02190 | hypothetical protein                       |  |  |  |  | 6.443  | 0.401  | 2.1E-01 | 0.274  | 0.090  | 7.3E-01 | 1.243  | 0.225  | 4.5E-01 | 1.124  | 0.487  | 3.6E-01 | 0.776  | 0.074  | 6.2E-01 |
| SAOUHSC_02059 | phi PVL orf 52-like protein                |  |  |  |  | 0.275  | 0.318  | 1.0E-05 | 0.520  | 0.235  | 1.2E-04 | 4.211  | 1.968  | 1.1E-04 | 1.180  | 1.073  | 1.7E-08 | 0.529  | 0.466  | 4.1E-08 |
| SAOUHSC_02366 | fructose-bisphosphate aldolase             |  |  |  |  | 1.769  | 2.269  | 4.5E-06 | 0.959  | 1.229  | 5.8E-08 | 32.856 | 18.336 | 4.8E-03 | 11.362 | 8.580  | 2.9E-05 | 14.745 | 9.319  | 7.5E-05 |
| SAOUHSC_02333 | sceD protein                               |  |  |  |  | 1.700  | 1.763  | 5.3E-03 | 1.824  | 1.378  | 2.6E-02 | 4.229  | 0.323  | 2.6E-02 | 1.543  | 0.713  | 4.9E-04 | 2.576  | 0.724  | 5.6E-05 |
| SAOUHSC_01077 | hypothetical protein                       |  |  |  |  | 0.000  | 0.000  | 1.6E-02 | 0.032  | 0.017  | 6.6E-03 | 6.643  | 0.687  | 3.1E-01 | 2.294  | 0.336  | 1.2E-02 | 1.917  | 1.063  | 1.8E-03 |
| SAOUHSC_01526 | hypothetical protein                       |  |  |  |  | 1.333  | 1.420  | 1.0E-01 | 0.125  | 0.144  | 6.5E-03 | 6.538  | 3.169  | 9.3E-01 | 3.088  | 1.044  | 8.1E-02 | 1.163  | 0.229  | 3.3E-03 |
| SAOUHSC_01500 | hypothetical protein                       |  |  |  |  | 0.817  | 0.943  | 1.7E-03 | 2.092  | 0.901  | 9.3E-04 | 5.446  | 5.235  | 9.7E-03 | 2.539  | 0.829  | 4.6E-05 | 0.761  | 0.701  | 3.2E-07 |
| SAOUHSC_01181 | hypothetical protein                       |  |  |  |  | 2.390  | 1.787  | 6.8E-02 | 1.208  | 0.580  | 1.6E-03 | 4.839  | 0.342  | 5.6E-03 | 3.387  | 0.146  | 0.6E-04 | 3.691  | 1.825  | 1.2E-02 |
| SAOUHSC_01874 | hypothetical protein                       |  |  |  |  | 5.042  | 5.124  | 2.0E-01 | 0.143  | 0.057  | 3.8E-03 | 4.295  | 0.918  | 6.4E-02 | 3.689  | 1.961  | 4.1E-02 | 2.400  | 0.370  | 4.2E-03 |
| SAOUHSC_00718 | hypothetical protein                       |  |  |  |  | 0.000  | 0.000  | 2.8E-05 | 0.040  | 0.010  | 3.1E-07 | 4.242  | 1.217  | 1.4E-07 | 1.540  | 0.283  | 1.2E-13 | 2.241  | 0.329  | 1.1E-10 |
| SAOUHSC_02083 | bacteriophage L54a, Cro-like protein       |  |  |  |  | 0.000  | 0.000  | 5.9E-06 | 0.000  | 0.000  | 1.7E-06 | 13.359 | 5.816  | 4.8E-03 | 2.363  | 1.130  | 6.4E-09 | 3.912  | 3.883  | 3.4E-05 |
| SAOUHSC_02041 | phi Mu50B-like protein                     |  |  |  |  | 0.599  | 0.420  | 3.6E-02 | 0.169  | 0.099  | 7.0E-02 | 5.138  | 0.293  | 3.7E-01 | 0.683  | 0.013  | 1.6E-03 | 2.892  | 0.683  | 1.1E-01 |
| SAOUHSC_00573 | putative heme peroxidase                   |  |  |  |  | 4.974  | 3.732  | 1.5E-02 | 2.414  | 1.454  | 8.3E-04 | 1.708  | 1.147  | 7.2E-07 | 6.521  | 0.570  | 1.3E-03 | 1.779  | 0.881  | 5.4E-09 |
| SAOUHSC_01504 | ferredoxin                                 |  |  |  |  | 0.668  | 0.000  | 2.8E-03 | 0.000  | 0.000  | 7.2E-04 | 2.819  | 2.215  | 4.0E-02 | 4.410  | 3.710  | 1.9E-01 | 2.537  | 0.290  | 3.4E-03 |
| SAOUHSC_01421 | hypothetical protein                       |  |  |  |  | 0.668  | 0.337  | 2.1E-03 | 1.058  | 0.154  | 1.7E-03 | 3.409  | 3.564  | 1.9E-04 | 4.059  | 1.444  | 4.3E-04 | 2.299  | 0.591  | 1.4E-04 |
| SAOUHSC_02170 | peptidoglycan hydrolase                    |  |  |  |  | 1.219  | 0.470  | 1.2E-01 | 1.647  | 1.213  | 2.2E-01 | 3.504  | 0.845  | 3.5E-01 | 2.424  | 0.409  | 1.3E-01 | 6.098  | 3.495  | 6.5E-01 |
| SAOUHSC_01135 | hypothetical protein                       |  |  |  |  | 12.194 | 13.579 | 4.7E-02 | 11.915 | 1.824  | 5.5E-02 | 3.308  | 0.310  | 6.0E-02 | 13.373 | 6.289  | 4.6E-03 | 63.279 | 72.373 | 8.6E-02 |
| SAOUHSC_02391 | hypothetical protein                       |  |  |  |  | 1.402  | 1.399  | 2.9E-07 | 87.663 | 97.773 | 1.9E-01 | 1.825  | 2.107  | 1.2E-08 | 6.981  | 8.061  | 9.4E-08 | 38.703 | 43.993 | 4.4E-02 |
| SAOUHSC_01325 | hypothetical protein                       |  |  |  |  | 0.921  | 1.068  | 4.0E-03 | 1.027  | 0.259  | 5.1E-04 | 0.211  | 0.245  | 4.7E-06 | 0.851  | 0.678  | 2.2E-06 | 4.523  | 5.248  | 6.2E-03 |
| SAOUHSC_01783 | hypothetical protein                       |  |  |  |  | 0.266  | 0.307  | 2.9E-07 | 0.230  | 0.265  | 5.1E-06 | 2.383  | 2.752  | 8.7E-10 | 0.914  | 0.775  | 2.5E-10 | 7.124  | 7.666  | 5.9E-10 |
| SAOUHSC_02378 | hypothetical protein                       |  |  |  |  | 8.100  | 7.732  | 8.9E-02 | 1.840  | 2.163  | 4.2E-04 | 1.444  | 0.326  | 1.9E-05 | 1.659  | 0.313  | 8.6E-07 | 4.594  | 2.366  | 1.3E-05 |

Curated as under-represented in condition (Blue box) or over-represented in condition; 'Supergrowers' (Green box)  
 \*Abs, abscess; BI, blood; VH, vitreous fluid; AH, aqueous fluid.
