# Supplementary material for: Genes Contributing to Staphylococcus aureus Fitness in Abscess- and Infection-Related Ecologies
Source: PubMed Central journal article supplement — mBio. 2014 Sep 2;5(5):e01729-14. doi: 10.1128/mBio.01729-14 (PMC4173792; doi:10.1128/mbio.01729-14), 2014-09-02
Supplement: mbo999101979st4.pdf [file mbo999101979st4.pdf]

**Table S4. Primers used in this study.**

| Primer                   | Sequence                                                       |
|--------------------------|----------------------------------------------------------------|
| Tnseq Library Sequencing |                                                                |
| olj376                   | GTGACTGGAGTTCAGACGTGTGCT CTCCGATCTGGGGGGGGGGGGGGGG             |
| olj510                   | CCAAAATCCGTTCTTTTTCATAGTTCCTATATAGTTATACGC                     |
| olj511                   | AATGATACGGCGACCACCGAGATCTACACTCTTTGACCGGGGACTTATCAGCCAACCTGTTA |
| olj512                   | ACACTCTTTGACCGGGGACTTATCAGCCAACCTGTTA                          |
| Antisense                |                                                                |
| SAOUHSC_00947-fwd        | GCGAGGTACCGGGATTAGATATTCTATCCGTTAAATTA                         |
| SAOUHSC_00947-rvs        | GCGAGAATTCGCCACCTAAATATGTTGTTGCAA                              |
| SAOUHSC_00486-fwd        | GCGAGGTACCGGGAAGTAGGAGGAAATG                                   |
| SAOUHSC_00486-rvs        | GCGAGAATTCCTAATAACTCTTGTTTCAGTCATTAAG                          |
| SAOUHSC_00889-fwd        | GCGAGGTACCGGAGGACAACATAGTGAGTTTG                               |
| SAOUHSC_00889-rvs        | GCGAGAATTC AACATCATCAATTACCGTATG                               |
| SAOUHSC_01203-fwd        | GCGAGGTACCGATGATTCAAGAGCAACACAT                                |
| SAOUHSC_01203-rvs        | GCGAGAATTCGGAACACCTATATGTCGTATC                                |
| SAOUHSC_01239-fwd        | GCGAGGTACCGAGCAGGCATTATGTGTC                                   |
| SAOUHSC_01239-rvs        | GCGAGAATTCGCACCAATAGCAATAATCGTTG                               |
| SAOUHSC_01263-fwd        | GCGAGGTACCATATAAAGAGCAAACCCTAGAAAAGG                           |
| SAOUHSC_01263-rvs        | GCGAGAATTCGCATATTCTACTGCTCTAG                                  |
| SAOUHSC_01857-fwd        | GCGAGGTACCGTCAGCTATTTTTGGCAC                                   |
| SAOUHSC_01857-rvs        | GCGAGAATTCGACTCTTGTGAATCAGATCTTG                               |
| SAOUHSC_02383-fwd        | GCGAGGTACCCTAAAATTTATTCAGGTTAAGGAG                             |
| SAOUHSC_02383-rvs        | GCGAGAATTCATGTTTGACTTTGACTATACG                                |
| SAOUHSC_00022-fwd        | GCGAGGTACCGTCATTTTAGCACTACTCG                                  |
| SAOUHSC_00022-rvs        | GCGAGAATTCGCCATCATATTCTACATACC                                 |
